# Supplementary material for: A Rare Case of Coronavirus Disease 2019 Encephalitis Mimicking Creutzfeldt-Jacob Disease in an Immunocompromised Patient: A Case Report
Source: PubMed Central journal article supplement — Case Rep Neurol. 2024 Jun 13;16(1):180–7. doi: 10.1159/000539741 (PMC11249769; doi:10.1159/000539741), 2024-06-13
Supplement: Supplementary_material-Suppl.2-s2.pdf [file Supplementary_material-Suppl.2-s2.pdf]

## **Diabetes and COVID 19**

As the COVID-19 pandemic continues to challenge healthcare systems worldwide, the role of underlying health conditions in disease severity and mortality has become increasingly evident. Among these conditions, diabetes stands out as a significant contributor to adverse outcomes in COVID-19 patients. Diabetes, a chronic metabolic disorder affecting millions globally, has been identified as a key risk factor for severe COVID-19. Studies consistently reveal that individuals with diabetes are more likely to experience severe respiratory distress, require intensive care, and face a higher mortality rate when infected with the SARS-CoV-2 virus. The reasons behind this synergy between diabetes and COVID-19 are multifaceted.

Firstly, diabetes compromises the immune system's ability to combat infections effectively, making patients more susceptible to viral complications. Secondly, diabetes often coexists with other comorbidities, such as cardiovascular disease and hypertension, further exacerbating COVID-19's impact. Additionally, the chronic inflammation and hyperglycemia associated with diabetes create an environment in which the virus can thrive. Furthermore, the management of diabetes becomes challenging during COVID-19 treatment due to the interplay of various medications and their effects on glucose levels. This complicates patient care and underscores the need for specialized attention.

Understanding the significance of diabetes in COVID-19 is vital for healthcare providers and policymakers. It highlights the urgency of vaccinating diabetic individuals, implementing preventive measures, and optimizing diabetes management to reduce mortality rates. As the pandemic unfolds, recognizing and addressing the complex relationship between diabetes and COVID-19 remains paramount in our efforts to save lives and minimize the impact of this deadly virus.

## **COVID 19 and mucormycosis:**

COVID virus modulates the immune system and make it a conducive for fungal infection. The corticosteroid utility in COVID 19 disease pose a serious complication including an invasive fungal infection. Rhino orbital cerebral mucormycosis has high mortality which needs timely medical and surgical debridement.
